# Supplementary material for: Bone disease imaging through the near-infrared-II window
Source: PubMed Central journal article supplement (PMC10562434; doi:10.1038/s41467-023-42001-2), 2023-10-09
Supplement: 41467_2023_42001_MOESM3_ESM.pdf [file 41467_2023_42001_MOESM3_ESM.pdf]

## **Description of Additional Supplementary Files**

**Supplementary Movie 1:** In vivo 3D NIR-II mouse tibia imaging.

**Supplementary Movie 2:** Ex vivo 3D NIR-II mouse tibia imaging.
